# Supplementary material
Source: ML conference proceedings conference paper supplement (https://openreview.net/forum?id=wNobG8bV5Q)
Supplement: supplementary_material [file attachment]

# LLM-BASED TYPED HYPERRESOLUTION FOR COMMONSENSE REASONING WITH KNOWLEDGE BASES

**Anonymous authors**

Paper under double-blind review

## ABSTRACT

Large language models (LLM) are being increasingly applied to tasks requiring commonsense reasoning. Despite their outstanding potential, the reasoning process of LLMs is prone to errors and hallucinations that hinder their applicability, especially in high-stakes scenarios. Several works have attempted to enhance commonsense reasoning performance of LLMs by (i) using prompting styles that elicit more accurate reasoning, (ii) utilizing the LLM as a semantic parser for a symbolic reasoner, or (iii) enforcing the LLM to simulate a logical inference rule. However, all these solutions have critical limitations: they are unable to leverage the internal commonsense knowledge of the LLM in tandem with an axiomatic knowledge base, they lack a mechanism to reliably repair erroneous inference steps, and their application is restricted to small knowledge bases that fit the context limit of the LLM. In this work, we present LLM-based Typed Hyperresolution (LLM-TH), a logical commonsense reasoning framework that leverages “*theory resolution*”, a concept from classical logical inference which enables integrating LLMs into the “*resolution*” inference rule, thus mitigating reasoning errors and hallucinations and enabling verification of the reasoning procedure. LLM-TH is also equipped with a mechanism for repairing erroneous inference steps supported by theoretical guarantees. Using “*Hyperresolution*” and “*Typed inference*” schemes, we show that LLM-TH can efficiently reason over large knowledge bases consisting of tens of thousands of rules with arbitrary predicate arities. Our experiments on three diverse language-based reasoning tasks—preference reasoning, multi-domain deductive reasoning, and geographical question answering—showcase that LLM-TH, using merely a BART 406M parameter NLI entailment model, significantly reduces reasoning errors compared to baselines using Llama3-70B, Gemini1.5-Flash, GPT-3.5-Turbo, and Mixtral-46.7B.

## 1 INTRODUCTION

The breakthrough in Large Language Models (LLMs) has significantly impacted AI research, paving the way for deploying AI-powered systems in various tasks and applications. This huge impact is primarily due to the outstanding performance of LLMs in tasks that require substantial reasoning skills (Chang et al., 2024; Plaat et al., 2024). LLMs have also acquired commonsense understanding, a critical element for interacting with the real world (Zhao et al., 2024; Valmeekam et al., 2024). However, reasoning performance of LLMs is not infallible. They commonly show reasoning errors and make hallucinations—generating incorrect outputs that seem valid—which hinders their reliable deployment, particularly in high-risk tasks (Tonmoy et al., 2024; Zhang et al., 2023b).

To overcome these challenges in LLM-based reasoning, several approaches have been proposed in the literature that can be broadly categorized into three groups: (i) Using prompting styles that can elicit more accurate reasoning from the LLM (Wei et al., 2022; Kojima et al., 2022; Zhou et al., 2022) or augmenting the prompt by retrieved information (Lewis et al., 2020b), (ii) using the LLM to translate natural language problem and knowledge bases (KB) for a symbolic logical solver (Olausson et al., 2023; Pan et al., 2023), and (iii) using the LLM to emulate a logical inference rule to solve the reasoning problem (Kazemi et al., 2023; Lee & Hwang, 2024).

These works have notably advanced the logical reasoning performance of LLMs; yet, they are all hindered by a number of important limitations: (a) Their application is limited to small KBs that can

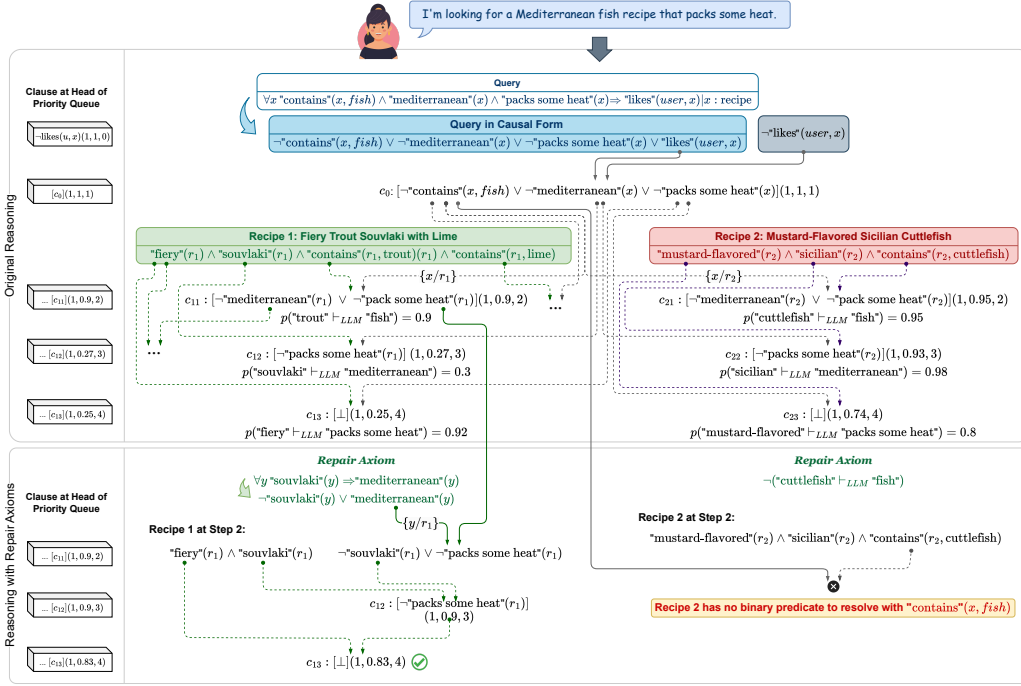

Figure 1: Workflow of LLM-TH shown with a preference reasoning example. Top: Using LLM-based typed hyperresolution to compute proof scores for each recipe option to entail user query. Negated query is the first active clause, and each resolvent is assigned a priority tuple: (type entailment score, predicate entailment score, proof length score) and pushed to the priority queue (only the foremost clause is shown for priority queue of recipe 1 which becomes the next active clause). LLM makes two mistakes: assigning a low score to “Souvlaki” entailing “Mediterranean” and a high score to “cuttlefish” entailing “fish”. Bottom: Both kinds of mistakes can be fixed after the insertion of repair axioms, resulting in the correct recommendation of Recipe 1.

fit into the context limit of the LLM, and are not scalable to perform reasoning on practical KBs such as the widely-used Knowledge Graphs (KG) containing thousands of facts and axioms. (b) They are restricted to perform reasoning on a complete KB containing all rules required to solve the problem. However, assuming access to such KB is typically unrealistic in practical use cases, thus calling for the necessity of a methodology to leverage the internal commonsense knowledge of the LLM in the reasoning process. (c) All steps involved in the reasoning process are not transparent and thus, the correctness of the final answer cannot be determined by inspecting the reasoning process. (d) Upon observation of a reasoning error, they do not provide any reliable framework to fix the error and ensure it will not occur in the future.

In this work, we aim to address these limitations by making the following contributions:

- We introduce LLM-based Typed Hyperresolution (LLM-TH), a framework for efficient logical commonsense reasoning with KBs containing predicates of arbitrary arities, that facilitates the incorporation of the internal commonsense knowledge of LLMs in the reasoning process. LLM-TH is founded on “theory resolution” (Stickel, 1985; Baumgartner, 1992), a concept from classical logical reasoning that allows for the incorporation of specialized theorem provers into the resolution inference rule. (Section 3.1)
- We equip LLM-TH with a mechanism for incorporating the type information of the variables and constants in the problem domain to prune the proof search space and terminate the exploration of reasoning paths that are unlikely to succeed at very early stages. Also, using hyperresolution, an extension of resolution that enables combining clauses to perform several resolution steps simultaneously, we make LLM-TH an efficient and scalable

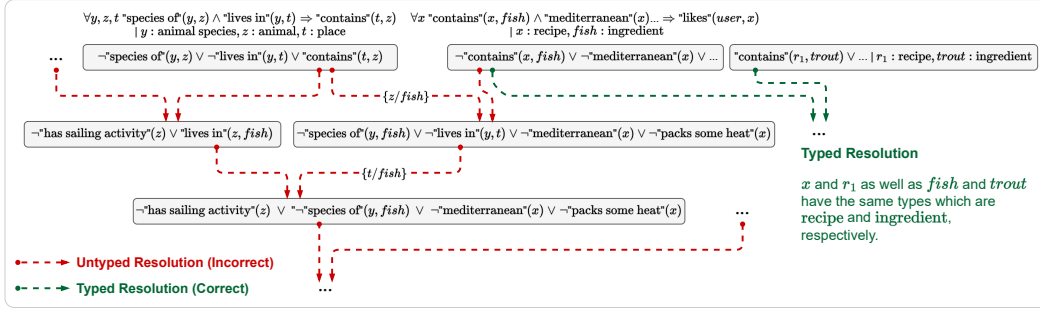

Figure 2: An example of typing mechanism of LLM-TH. The binary predicate “contains” is common among clauses from different domains. Left: Application of resolution rule without considering types leads to resolving a literal about “recipes” with complementary literals from domains such as “animals”. Each incorrect resolution results in a new branch that will be explored but leads to failure, making the process inefficient. Right: in typed resolution, only literals with consistent variable and constant types will be unified, therefore pruning the search space and enhancing efficiency.

reasoning framework for logical commonsense reasoning with LLMs. We show that LLM-TH is easily scalable to KBs consisting of tens of thousands of rules. (Section 5.2.1)

- We show that by providing access to the exact axioms and facts used at every reasoning step, LLM-TH results in a verifiable and faithful reasoning performance. Furthermore, we propose a reliable repair methodology for missed inferences and incorrect reasoning steps due to LLM hallucinations and missed inferences, and provide theoretical proof that it reliably fixes reasoning errors. (Section 4)
- We show that by using the theory hyperresolution framework, LLM-TH is able to leverage the internal commonsense knowledge of the LLM to compensate for KB incompleteness and perform accurate and reliable reasoning. (Section 5.2.2)
- We experiment with LLM-TH on three different tasks involving commonsense reasoning: preference reasoning, multi-domain deductive reasoning, and geographical QA, showcasing the superiority of LLM-TH in terms of answer and reasoning accuracy over Chain of Thought (Kojima et al., 2022; Wei et al., 2022) and retrieval augmented generation (RAG) (Lewis et al., 2020b) baselines using orders of magnitude larger LLMs. (Section 5)

## 2 RELATED WORKS

**Eliciting Stronger Reasoning from LLMs** As LLMs scale, they exhibit emergent behaviors such as the capability of solving problems that involve reasoning (Chang et al., 2024; Huang & Chang, 2022). However, their reasoning performance often suffers from errors and incorporating hallucinated facts in their judgments (Tonmoy et al., 2024; Zhang et al., 2023b). Several works have shown that with certain prompting techniques such as Chain of Thought (CoT) (Wei et al., 2022; Kojima et al., 2022), Tree of thought (Yao et al., 2024), Selection-Inference (Creswell et al., 2022), Self-consistency (Wang et al., 2022), Least to most prompting (Zhou et al., 2022), etc., more accurate reasoning can be elicited from LLMs. Retrieval Augmented Generation (RAG) (Lewis et al., 2020b) has also been noted as an effective approach in reducing reasoning errors and hallucinations by including relevant content retrieved from a KB in the prompt to condition LLM’s reasoning on dependable information. These methods have made significant progress in advancing the reasoning behavior of LLMs, but even applying them does not guarantee an accurate reasoning behavior from the LLM. Furthermore, since the LLM is entirely in charge of doing the reasoning, there is no control over the reasoning process and its correctness cannot be verified (Shanahan, 2024; Pan et al., 2023). Moreover, the performance of these methods has been shown to degrade when being applied to long-horizon (Dziri et al., 2024) and out-of-domain (Saparov et al., 2024) reasoning tasks as well as problems involving negation (Anil et al., 2022) and contraposition (Zhang et al., 2024).

**Formal Reasoning with LLMs** To offer more control over the reasoning process, two groups of work have been proposed for performing formal reasoning, with the use of LLMs: (i) *Semantic pars-*

ing methods remove the LLM from reasoning and only use it to translate the problem into a symbolic format and delegate the reasoning task to a symbolic solver (Pan et al., 2023; Olausson et al., 2023). (ii) Works enforcing the LLM to emulate an established logical inference rule such as backchaining by performing tasks like goal decomposition, rule selection, and fact-checking (Kazemi et al., 2023; Lee & Hwang, 2024). While these groups of works make significant progress in mitigating hallucinations, they both rely on the existing rules in the KB and have no particular mechanism to leverage the rich commonsense knowledge of the LLM in their reasoning. Although recent works (Toroghi et al., 2024a) have used resolution inference rule for logical LLM-based reasoning, they are restricted to unary predicates and can only do reasoning over small KBs.

**LLM-based Commonsense Reasoning** Commonsense knowledge, the general understanding and knowledge that humans possess about the world, is a significant cognitive ability of humans. Endowing AI agents with commonsense knowledge has been a longstanding challenge (Rajani et al., 2019). LLMs have made significant progress in this regard and have shown to obtain outstanding commonsense knowledge (Zhao et al., 2024; Krause & Stolzenburg, 2023). However, incorporating the commonsense knowledge of the LLMs in the reasoning process also comes with the risk of hallucinations and reasoning errors (Shen & Kejriwal, 2023; Toroghi et al., 2024b). Therefore, proposing a methodology for leveraging this rich commonsense knowledge in the formal reasoning process to enable reasoning over incomplete KBs in a verifiable and efficient manner is essential.

### 3 METHODOLOGY

In this section, we first introduce the theoretical concepts that our method is founded on, and next explain our proposed reasoning framework. In this work, we consider a function and equality-free first-order logical (FOL) syntax in clausal normal form (Chang & Lee, 2014).

**Resolution Rule and Hyperresolution** *Resolution* is a sound and complete inference rule which is widely used in logical reasoning. From two premise clauses containing complementary literals, resolution rule derives a *resolvent* clause by canceling (resolving) the complementary literals, e.g.,

$$\frac{A(x) \vee B(x, y) \quad \neg B(w, z) \vee C(z)}{A(x) \vee C(y)}, \quad (1)$$

under the unification  $\theta = \{x/w, y/z\}$ . Repeated application of the resolution rule will either result in a contradiction, e.g., deriving both  $A(x)$  and  $\neg A(x)$  indicating an inconsistent clause set, or reaching a point where no further resolutions are possible.

The efficiency of the repeated application of the resolution rule can be substantially improved by *hyperresolution* (Robinson, 1965), an extension of resolution that enables combining multiple resolution steps in one inference step. Concretely, it resolves positive literals with all possible matching negative clauses simultaneously, e.g.,

$$\frac{A(x) \vee B_1(x, y) \dots \vee B_n(x, y) \quad C(z) \vee \neg B_1(w, z) \vee \dots \vee \neg B_n(w, z)}{A(x) \vee C(y)}, \theta = \{x/w, y/z\}. \quad (2)$$

**LLM-based Theory Resolution** Application of the resolution rule is originally restricted to clauses with complementary literals that share identical predicates. Theory resolution (Stickel, 1985; Baumgartner, 1992) relaxes this condition and broadens the applicability of the resolution rule by integrating special-purpose theories into resolution. Based on theory resolution, given two clauses  $c_1 = A(x) \vee B(x, y)$  and  $c_2 = \neg C(w, z) \vee D(z)$ , if a theorem prover  $T$  identifies  $B(x, y)$  and  $\neg C(w, z)$  under unification  $\theta = \{x/w, y/z\}$  to be unsatisfiable (i.e.,  $\forall x \forall y B(x, y) \wedge \neg C(x, y) \vdash_T \perp$ ), the clauses can be resolved despite lacking complimentary literals with identical predicates:

$$\frac{A(x) \vee B(x, y) \quad \neg C(w, z) \vee D(z)}{A(x) \vee D(y)}, \theta = \{x/w, y/z\}. \quad (3)$$

In this work, we use an LLM as the theory that identifies the unsatisfiable natural language predicates to perform reasoning via theory resolution. Translating natural language to symbolic form, as semantic parsing methods do, is substantially restricted. For example, they map “*packs some heat*”

and being “*spicy*” to completely different symbolic predicates. Therefore, a symbolic reasoner is unable to discern their entailment relationship unless given explicit axioms.

Using LLM-based theory resolution, we can integrate the LLM’s commonsense knowledge into the reasoning process to find entailments between predicates and constants without requiring explicit axioms. We do this in an extended version of FOL in which predicates, functions, and constants are no longer symbols, but natural language text. In this logical system, which we call *natural language logic*, the unsatisfiability condition in theory resolution reduces to natural language entailment. In other words, if an LLM identifies a natural language predicate  $B$  to entail predicate  $D$ , i.e.,  $B(x) \vdash_{LLM} D(x)$ , and therefore,  $B(x) \wedge \neg D(x) \vdash_{LLM} \perp$ , then literals  $B(x)$  and  $D(x)$  can be resolved. For instance, given clauses  $c_1 = \text{“packs some heat”}(x)$  and  $c_2 = \neg \text{“spicy”}(x) \vee Q(x)$ , in which  $Q(x)$  is another literal with a natural language predicate, since the LLM identifies the natural language entailment  $\text{“packs some heat”} \vdash_{LLM} \text{“spicy”}$ , a theory resolution step can be performed as

$$\frac{\text{“packs some heat”}(x) \quad \neg \text{“spicy”}(x) \vee Q(x)}{Q(x)} . \quad (4)$$

**LLM-based Typed Theory Resolution** Although resolution is one of the most widely used inference rules in logical reasoning with the key properties of being sound and complete, its application on real-world large-scale knowledge bases is computationally expensive. One of the key challenges is that the space of possible resolutions—the combinations of literals and clauses that can potentially be unified and resolved—can become enormous, and grows exponentially during the resolution process, leading to inefficiencies in finding contradictions or valid derivations. This challenge is often addressed by choosing particular orderings that first explore resolution steps that are more likely to lead to valid proof (Baumgartner, 1992; Sanner & McIlraith, 2006).

In addition to proposing an ordering strategy which is explained in 3.1, we introduce the notion of typing into theory resolution which considerably prunes the space of possible resolutions. Many of the created resolvents during the resolution process, each opening a new search branch, are created by unifying variables and constants with inconsistent ontological types. For instance, a literal  $\text{“small”}(x)$  in a clause about *vehicles* can be resolved with a literal  $\text{“small”}(y)$  which is about *animals*. However, the search branch created by this resolvent is very unlikely to result in a valid proof as it is created by a semantically invalid unification, and in future steps, the proof will be stopped as no further resolutions could be made. By associating variables and constants with their ontological types and considering type consistency in unification, we can significantly prune the space of allowable resolutions, by preventing the exploration of type inconsistent branches from the beginning.

Variable types can be introduced into an FOL sentence as unary predicates, e.g.,  $\text{“animal”}(x)$ . Considering a universally quantified sentence in FOL as

$$\forall x \forall y \ H(x) \wedge T(y) \wedge A(x, y) \implies R(x, y), \quad (5)$$

where  $H(\cdot)$  and  $T(\cdot)$  are unary predicates indicating types of their corresponding variables, we equivalently write the above sentence in the *typed* FOL as

$$\forall x \forall y \ A(x, y) \implies R(x, y) | x : H, y : T, \quad (6)$$

where,  $x : H$  and  $y : T$  indicate that  $x$  and  $y$  are of type  $H$  and  $T$  respectively. This clause can be equivalently written in the clausal form as

$$\forall x \forall y \ \neg A(x, y) \vee R(x, y) | x : H, y : T, \quad (7)$$

Next, consider another clause in typed FOL as

$$\forall w \forall z \ \neg R(w, z) \vee S(w, z) | w : M, z : N. \quad (8)$$

By introducing the unifier  $\theta = \{w/x, z/y\}$ , we can perform *typed resolution* between the two clauses 7 and 8 as

$$\frac{\neg A(x, y) \vee R(x, y) | x : H, y : T \quad \neg R(w, z) \vee S(w, z) | w : M, z : N}{\neg A(x, y) \vee S(x, y) | x : C, y : D}, \quad (9)$$

where  $C$  and  $D$ , the types of resolvent variables are  $C \equiv H \sqcap M$  and  $D \equiv T \sqcap N$  using the following lemma which is proved in Appendix A. Here,  $\sqcap$  indicates unary type intersection (conjunction).

**Algorithm 1** LLM-TH Algorithm

---

```

1: Input:  $\mathcal{K}$ ,  $q$ ,  $max\_proofs$ ,  $max\_iters$ 
2:  $proofs \leftarrow \emptyset$ 
3:  $PQ \leftarrow \emptyset$  //  $PQ$  is an initially empty priority queue.
4:  $PQ.push(\neg q, (1, 1, 0))$  // Negation of the initial query  $q$  has priority  $(1, 1, 0)$ ,  $PQ$  is ordered by
   Equation 15
5: while  $i < max\_iters$  do
6:   while  $PQ \neq \emptyset \wedge i < max\_proofs$  do
7:      $c \leftarrow PQ.pop()$ 
8:     if  $c = \perp$  then
9:        $max\_proofs++$ 
10:       $proofs \leftarrow proofs \cup \{c\}$ 
11:     else
12:        $\beta_c \leftarrow$  candidate clauses in  $\mathcal{K}$  with similar arity to  $c$ 
13:       for  $c_{target} \in \mathcal{K}$  do
14:         Perform hyperresolution to compute resolvent  $c_{res}$  of  $c$  and  $c_{target}$  using Equation 2
15:          $PQ.push(c_{res}, (\rho^t(c_{res}), \rho^e(c_{res}), \rho^l(c_{res})))$  // cf. Equations 11, 13 and 14
16: Output:  $proofs$ 

```

---

**Lemma 1.** Resolving two disjunctive clauses  $c_1$  and  $c_2$  that include complimentary literals  $l(x_1, \dots, x_n)|x_1 : T_1, \dots, x_n : T_n$  and  $\neg l(y_1, \dots, y_n)|y_1 : H_1, \dots, y_n : H_n$  under the unifier  $\theta = \{x_1/y_1, \dots, x_2/y_2\}$  creates a resolvent  $c_{res}$  with type variables  $x_1 : T_1 \sqcap H_1, \dots, x_n : T_n \sqcap T_n$ .

Typed resolution can be directly extended to typed theory resolution in our natural language-based logical system by resolving literals  $B(x_1, \dots, x_n)|x_1 : T_1, \dots, x_n : T_n$  and  $D(y_1, \dots, y_n)|y_1 : H_1, \dots, y_n : H_n$  if the LLM identifies the natural language predicate  $B$  to entail  $D$ , i.e.,  $B(x_1, \dots, x_n) \vdash_{LLM} D(y_1, \dots, y_n)$  if their unified variables have consistent types. In the next section, we elaborate on how type consistency is checked in our LLM-TH framework.

### 3.1 LLM-TH ALGORITHM

This section presents LLM-TH, our proposed algorithm for efficient logical commonsense reasoning, which is based on theory resolution (Stickel, 1985; Baumgartner, 1992) extended to LLM theory resolution with predicates of arbitrary arity, hyperresolution, and simultaneous type inference. Its workflow is shown in a worked example in Figures 1 and 2, and formalized in Algorithm 1.

**Problem Definition** Let  $\mathcal{Q}$  denote a set of queries and  $\mathcal{K}$  represent a knowledge base (KB) comprising a set of axioms  $\mathcal{A}$  and facts  $\mathcal{F}$ , all expressed in natural language logic and clausal form with arbitrary predicate arities. In this work, we propose an inference rule  $i$  that, for each query  $q \in \mathcal{Q}$ , identifies a set of proofs, denoted as  $proofs$ . Each proof  $f \in proofs$  consists of a subset of clauses in  $\mathcal{K}$ , and is assigned a priority score  $\rho$  reflecting the priority of the proof.

**Algorithm** To prove  $\mathcal{K}$  entails the query  $q$  via resolution, we need to show that repeatedly using the resolution rule on  $\mathcal{K} \wedge \neg q$  leads to a contradiction, and is thus unsatisfiable. Following the backward chaining paradigm that offers efficiency benefits (Poole & Mackworth, 2010), we pick  $\neg q$  as the first active clause to be resolved with a clause from  $\mathcal{K}$ . At each step, given an active clause  $c = \bigvee_{i=1}^{|c|} l_i$  where each  $l_i$  is a literal of arbitrary arity, any clause  $c_{target} \in \mathcal{K}$  as  $c_{target} = \bigvee_{i=1}^{|c_{target}|} l_{target_i}$  is considered a *candidate clause* to be theory resolved with  $c$ , yielding the resolvent  $c_{res}$ , if at least one  $(l_i, l_{target_i})$  pair can be formed where  $l_i$  and  $l_{target_i}$  have equal arities. As  $\mathcal{K}$  is often large and expands further with new resolvents being derived as resolution advances, efficiency is a key desideratum, which LLM-TH achieves by prioritizing candidate clauses based on two criteria: (i) type consistency and (ii) predicate entailment between the active and candidate clauses.

*Restricting the Space of Resolutions with Typing:* The first mechanism employed in LLM-TH to enable efficient resolution is restricting the space of allowable resolutions by proposing typed theory resolution. Since in typed theory resolution, the types of variables in the resolvent clause are determined by the conjunction of the types of variables in their parent clause, LLM-TH prioritizes

clauses with variable types that align with those of the active clause, thereby increasing the chance of obtaining valid types in the resolvent. For example, if two candidate clauses are considered to be resolved with an active clause of variable type “*Animal*”, LLM-TH prioritizes a candidate clause with a unifying variable type “*Mammal*” over one with type “*Vehicle*”.

LLM-TH leverages the commonsense knowledge of the LLM to obtain the probability of entailment between the variable types. Formally, for the pair of literals with equal arities  $(l, l_{target})$ , denoting the set of argument types of  $l$  and  $l_{target}$  as  $T = \{t_i\}$  and  $T' = \{t'_i\}$  respectively, the plausibility of unifying each of their variables can be obtained by calculating the entailment probabilities between each  $t_i$  and  $t'_i$ . Since entailment is an asymmetric relation and its direction is unknown, we need to calculate both  $t_i \vdash_{LLM} t'_i$  and  $t'_i \vdash_{LLM} t_i$  to obtain the type consistency score. The average of type entailment scores for arguments determines  $\rho^{type}(c_{res})$ , the overall type priority score for  $c_{res}$ .

$$\rho^{type}(c_{res}) = \frac{1}{|T|} \sum_i (\max\{p(t_i \vdash_{LLM} t'_i), p(t'_i \vdash_{LLM} t_i)\}). \quad (10)$$

Since the main objective is to find the most plausible proofs, i.e., the sequences of most plausible theory resolution steps, we define the first entry of our priority score for each  $c_{res}$  as the overall type consistency score of all resolution steps beginning from  $\neg q$  that led to its derivation. Let  $\mathcal{P}_{c_{res}}$  be the set of parent clauses of  $c_{res}$ ; the proof type consistency score of  $c_{res}$  is inductively defined as

$$\rho^t(c_{res}) = \left( \prod_{c' \in \mathcal{P}_{c_{res}}} \rho^t(c') \right) \cdot \rho_{c_{res}}^{type}. \quad (11)$$

*Resolution Ordering based on Predicate Entailment:* Assigning the type consistency scores prunes the resolution search space ensuring that only clauses with compatible argument types will be considered for resolution. To further enhance efficiency, LLM-TH prioritizes the remaining clauses based on their potential for being part of a plausible proof considering their predicate entailment. As explained, in our LLM-based theory resolution framework, LLM entailment is used to identify unsatisfiability of clauses. Therefore, the greater probability the LLM assigns to  $l_{target}$  entailing  $l$ , the more plausible it becomes to resolve  $l$  and  $l_{target}$ . Therefore we define the plausibility of a theory resolution step between  $c$  and  $c_{target}$  by resolving literals  $l$  and  $l_{target}$  generating  $c_{res}$ , denoted by  $\rho_{c_{res}}^{entail}$

$$\rho_{c_{res}}^{entail} = p(l_{target} \vdash_{LLM} l). \quad (12)$$

These plausibility scores can help us prioritize the resolvent clauses based on their predicate entailment. For example, in the scenario depicted in Figure 1, resolving “*Sicilian*” with “*Mediterranean*” results in a higher entailment score compared to resolving “*Mustard-flavored*” with “*Mediterranean*”. Hence, it is prudent to prioritize the former resolvent, as it is more likely to contribute to the final proof. As the definition of the overall proof type consistency score, we can compute the overall predicate entailment score inductively to obtain the second entry of our priority score as

$$\rho^e(c_{res}) = \left( \prod_{c' \in \mathcal{P}_{c_{res}}} \rho^e(c') \right) \cdot \rho_{c_{res}}^{entail}. \quad (13)$$

Ultimately, among equally plausible proofs, we prioritize shorter ones that circumvent unnecessary steps. We define the proof length score, a third priority score that accounts for this preference. The proof length score of  $c_{res}$  is derived inductively from the maximum length of its parent clauses as

$$\rho^l(c_{res}) = 1 + \max_{c' \in \mathcal{P}_{c_{res}}} \rho^l(c'). \quad (14)$$

Each resolvent  $c_{res}$  is assigned the priority tuple  $(\rho^t(c_{res}), \rho^e(c_{res}), \rho^l(c_{res}))$  and then pushed to the priority queue  $PQ$ , in which the order of clauses is specified as

$$c_1 \preceq c_2 \iff [\rho^t(c_1) > \rho^t(c_2)] \vee [(\rho^t(c_1) = \rho^t(c_2)) \wedge (\rho^e(c_1) > \rho^e(c_2))] \vee [(\rho^t(c_1) = \rho^t(c_2)) \wedge (\rho^e(c_1) = \rho^e(c_2)) \wedge (\rho^l(c_1) < \rho^l(c_2))]. \quad (15)$$

By applying this prioritization scheme, the type consistency priority score first applies a hard filter to avoid exploration of resolvents with invalid types, and the predicate entailment and length priorities together enable an efficient inference via LLM-based theory resolution. These efficiency enhancements enable LLM-TH to be applied to large-scale KBs. Furthermore, it is able to reason over

incomplete KBs by benefiting from the commonsense knowledge of the LLM to fill in the missing axioms by identifying entailing predicates in the theory resolution process.

At the start of each iteration of LLM-TH, the clause with the highest rank in  $PQ$  becomes the active clause. When a resolution step yields a contradiction, the proof and its respective priority score are added to the set of found proofs by backtracking the ancestor clauses. The algorithm terminates when either a certain number of proofs are found or the maximum number of iterations is exceeded. Notably, LLM-TH is not limited to proving a single query; instead, it finds a set of proofs and assigns a strength score to each. This feature enables it to evaluate the likelihood of each query being entailed, which is critical for tasks requiring ranking, such as answering multiple-choice questions. Furthermore, LLM-TH can reason on incomplete KBs by using the LLM’s commonsense knowledge to fill in the missing axioms by identifying entailed predicates via theory resolution.

#### 4 FIXING ERRONEOUS RESOLUTIONS IN LLM-TH

LLM-TH enables the verification of the reasoning process by providing access to atomic resolution steps. Therefore, if an incorrect theory resolution step is performed due to an erroneous entailment probability assigned by the LLM, the source of failure can be easily identified. Here, we show that by adding a repair rule to the KB, LLM-TH can recover from its mistake and fix the reasoning. In the example provided in Figure 1, the LLM’s mistake in assigning a low entailment score for “*Souvlaki*” to entail “*Mediterranean*” leads to a missed inference. Also, incorrectly considering “*cuttlefish*” to entail being a “*fish*” leads to incorrectly resolving these literals. However, introducing the correct axiom  $\forall y \text{“Souvlaki”}(y) \implies \text{“Mediterranean”}(y)$  to the KB and introducing  $\neg(\text{“cuttlefish”} \vdash_{LLM} \text{“fish”})$  fix these mistakes. We formalize this property here and provide its proof in Appendix B.

**Proposition 1.** Consider proof  $P_c^\phi$  using axiom  $\phi$  that derives clause  $c$ . For any incorrect LLM reasoning axiom  $\phi$ , a Repair Axiom  $\phi'$  can be inserted such that  $P_c^{\phi'}$  will be produced before  $P_c^\phi$ .

#### 5 EXPERIMENTS

We empirically evaluate LLM-TH<sup>1</sup> on three different tasks representing commonsense reasoning with KBs on different datasets and compare it against variations of four different baselines to compare them from different aspects by answering the following questions:

- **RQ1-Scalability:** How does the reasoning performance of LLM-TH compare to baselines when reasoning with large, but complete knowledge bases?
- **RQ2-Reasoning with incomplete KBs:** How effectively do LLM-TH and the baselines use the LLM’s commonsense knowledge to compensate for the incompleteness of the KB?
- **RQ3-Efficiency:** How is the efficiency of LLM-TH influenced by typed hyperresolution?

##### 5.1 TASKS AND DATASETS DESCRIPTION

- **Preference reasoning:** An exemplar commonsense reasoning task is providing recommendations using natural language statements of user preferences and restrictions. We use Recipe-MPR (Zhang et al., 2023a), a benchmark dataset for this task that consists of 500 queries stating user recipe preferences, e.g., “*I want French food, but I’m on a budget*” and five-way recipe options. This dataset covers a broad range of commonsense reasoning skills such as temporal reasoning and analogical reasoning.
- **Multi-domain Deductive reasoning:** Since established datasets for logical commonsense reasoning with LLMs, e.g., ProntoQA (Saparov & He, 2022) and COPA-SSE (Brassard et al., 2022), have small KBs with less than 20 facts and axioms per query, we find them insufficient for evaluating the reasoning capability on large KBs. Thus, following the approach in Saparov & He (2022), we create a deductive reasoning dataset using manually written commonsense axioms and ground facts sampled from Wikidata knowledge graph (Vrandečić & Krötzsch, 2014). This dataset contains more than 32k rules about five different domains: Biological entities, foods, vehicles, drugs and diseases, and sports, and

<sup>1</sup><https://anonymous.4open.science/r/typed-logic-release-476D/>



Table 1: Reasoning performance of methods across the three datasets on complete KBs. The preference reasoning dataset lacks an explicit rule base, making RAG-based baselines irrelevant.

| Method                  | Preference Reasoning |             |             | Deductive Reasoning |             |             | Geographical QA |             |             |
|-------------------------|----------------------|-------------|-------------|---------------------|-------------|-------------|-----------------|-------------|-------------|
|                         | Accuracy             | RS Macro    | RS Micro    | Accuracy            | RS Macro    | RS Micro    | Accuracy        | RS Macro    | RS Micro    |
| <b>GPT-3.5 Turbo</b>    |                      |             |             |                     |             |             |                 |             |             |
| Zero-Shot CoT           | 0.86±0.04            | 0.60        | 0.80        | 0.69±0.02           | 0.45        | 0.48        | 0.71±0.03       | 0.60        | 0.77        |
| Few-Shot CoT            | 0.87±0.02            | 0.65        | 0.81        | 0.65±0.03           | 0.45        | 0.48        | 0.82±0.02       | 0.50        | 0.53        |
| RAG + Zero-Shot CoT     | NA                   | NA          | NA          | 0.68±0.02           | 0.85        | 0.92        | 0.74±0.01       | 0.80        | 0.88        |
| RAG + Few-Shot CoT      | NA                   | NA          | NA          | 0.69±0.02           | 0.65        | 0.84        | 0.83±0.02       | 0.75        | 0.84        |
| <b>Gemini-1.5-Flash</b> |                      |             |             |                     |             |             |                 |             |             |
| Zero-Shot CoT           | 0.84±0.04            | 0.60        | 0.75        | 0.60±0.01           | 0.40        | 0.81        | 0.78±0.03       | 0.20        | 0.51        |
| Few-Shot CoT            | 0.86±0.02            | 0.55        | 0.79        | 0.66±0.05           | 0.20        | 0.71        | 0.79±0.02       | 0.25        | 0.54        |
| RAG + Zero-Shot CoT     | NA                   | NA          | NA          | 0.78±0.02           | 0.85        | 0.93        | 0.79±0.03       | 0.50        | 0.72        |
| RAG + Few-Shot CoT      | NA                   | NA          | NA          | 0.86±0.04           | 0.45        | 0.72        | 0.78±0.03       | 0.25        | 0.47        |
| <b>Llama3 70B</b>       |                      |             |             |                     |             |             |                 |             |             |
| Zero-Shot CoT           | 0.87±0.01            | 0.55        | 0.80        | 0.80±0.03           | 0.15        | 0.77        | 0.78±0.01       | 0.25        | 0.57        |
| Few-Shot CoT            | <b>0.91±0.01</b>     | 0.70        | 0.84        | 0.78±0.02           | 0.55        | 0.58        | 0.87±0.02       | 0.45        | 0.45        |
| RAG + Zero-Shot CoT     | NA                   | NA          | NA          | 0.78±0.01           | 0.50        | 0.81        | 0.87±0.030      | 0.40        | 0.65        |
| RAG + Few-Shot CoT      | NA                   | NA          | NA          | 0.80±0.02           | 0.75        | 0.80        | 0.91±0.02       | 0.65        | 0.71        |
| <b>Mixtral 46.7B</b>    |                      |             |             |                     |             |             |                 |             |             |
| Zero-Shot CoT           | 0.79±0.03            | 0.60        | 0.84        | 0.59±0.02           | 0.30        | 0.66        | 0.71±0.02       | 0.50        | 0.70        |
| Few-Shot CoT            | 0.74±0.02            | 0.65        | 0.83        | 0.67±0.01           | 0.45        | 0.53        | 0.80±0.01       | 0.45        | 0.49        |
| RAG + Zero-Shot CoT     | NA                   | NA          | NA          | 0.65±0.02           | 0.65        | 0.81        | 0.66±0.07       | 0.25        | 0.51        |
| RAG + Few-Shot CoT      | NA                   | NA          | NA          | 0.46±0.03           | 0.30        | 0.43        | 0.70±0.06       | 0.50        | 0.65        |
| LLM-TH (BART 406M)      | 0.84                 | <b>0.90</b> | <b>0.94</b> | <b>1.00</b>         | <b>1.00</b> | <b>1.00</b> | <b>1.00</b>     | <b>1.00</b> | <b>1.00</b> |

1000 queries that answering them requires 2 to 7 reasoning steps. We release this dataset to encourage research on LLM-based commonsense reasoning on large-scale KBs.

- **Geographical QA:** Using the same approach for generating the multi-domain deductive reasoning dataset, we create a KB about geographical entities, e.g., cities, deserts, museums, etc. containing more than 12k rules and 500 queries which we also release.

## 5.2 BASELINES AND EVALUATION

Existing formal reasoning methods with LLMs, i.e., semantic parsing methods and methods emulating inference rules, suffer from two limitations that make them inapplicable to our studied datasets: (i) they cannot leverage the internal commonsense knowledge of the LLM and only rely on an explicit and complete rule base to perform reasoning, which the Recipe-MPR dataset lacks. (ii) They are limited to small KBs that can fit into the LLM context size, but our studied KBs are much larger. We use established methodologies for eliciting more faithful reasoning from the LLMs as our comparison baselines: (a) zero-shot CoT (Kojima et al., 2022) and (b) few-shot CoT (Wei et al., 2022), and (c) RAG (Lewis et al., 2020b) using a dense retriever (Song et al., 2020) to find relevant rules from the KB and prompting the LLM with zero-shot CoT and (d) few-shot CoT methods. We experiment each of these baselines using strong common LLMs: (1) Gemini 1.5-flash, (2) Llama3 (70B), (3) Mixtral (56.7B), and (4) GPT3.5 Turbo, while using BART large (Lewis et al., 2020a)<sup>2</sup> (406 M) trained on MNLI (Williams et al., 2018) dataset to obtain entailment probabilities for LLM-TH. We also use pyDatalog<sup>3</sup> for performing hyperresolution for grounding on the KB facts and use Gemini 1.5-flash to convert natural language axioms to clausal natural language logic form.

We evaluate the reasoning performance based on both, (1) the correctness of the final answer, measured by *accuracy*, and (2) the correctness of the reasoning process by evaluating proofs using the *reasoning score* (RS) (Kazemi et al., 2023) metric which is manually calculated for 20 randomly chosen responses in which the final answer was correct. RS is typically assessed as a binary decision based on whether the predicted proof is entirely aligned with the ground truth proof (Kazemi et al., 2023; Lee & Hwang, 2024), which leads to both a single erroneous step and wholly flawed reasoning being penalized equally. To achieve a more granular evaluation of the proofs, we calculate both the conventional *macro RS* and following the idea of Min et al. (2023), we propose a metric which we call *micro RS*. Let  $P$  be a provided proof and  $P^*$  a valid ground truth proof. Using the indicator function  $\mathbb{I}$ , we define the micro RS for each query as  $RS_{Micro} = \frac{1}{|P|} \sum_{p \in P} \mathbb{I}(p \in P^*)$ .

<sup>2</sup><https://huggingface.co/facebook/bart-large-mnli>

<sup>3</sup><https://pypi.org/project/pyDatalog/>

Table 2: Reasoning performance on incomplete KBs. Numbers in parenthesis indicate the difference with the method’s performance on a complete KB (Table 1) with  $\downarrow$  ( $\uparrow$ ) showing a decrease (increase).

| Method           | Deductive Reasoning                  |                                      | Geographical QA                      |                                      |
|------------------|--------------------------------------|--------------------------------------|--------------------------------------|--------------------------------------|
|                  | Zero-Shot CoT                        | Few-Shot CoT                         | Zero-Shot CoT                        | Few-Shot CoT                         |
| GPT-3.5-Turbo    | 0.65 $\pm$ 0.01 (0.03 $\downarrow$ ) | 0.54 $\pm$ 0.04 (0.15 $\downarrow$ ) | 0.60 $\pm$ 0.02 (0.14 $\downarrow$ ) | 0.64 $\pm$ 0.03 (0.19 $\downarrow$ ) |
| Gemini-1.5-Flash | 0.73 $\pm$ 0.02 (0.05 $\downarrow$ ) | 0.73 $\pm$ 0.01 (0.13 $\downarrow$ ) | 0.68 $\pm$ 0.02 (0.11 $\downarrow$ ) | 0.66 $\pm$ 0.02 (0.11 $\downarrow$ ) |
| Llama3 70B       | 0.77 $\pm$ 0.02 (0.01 $\downarrow$ ) | 0.77 $\pm$ 0.01 (0.03 $\downarrow$ ) | 0.66 $\pm$ 0.02 (0.21 $\downarrow$ ) | 0.66 $\pm$ 0.02 (0.25 $\downarrow$ ) |
| Mixtral 46.7B    | 0.50 $\pm$ 0.04 (0.14 $\downarrow$ ) | 0.48 $\pm$ 0.02 (0.03 $\uparrow$ )   | 0.53 $\pm$ 0.03 (0.12 $\downarrow$ ) | 0.58 $\pm$ 0.03 (0.13 $\downarrow$ ) |
| LLM-TH           | <b>0.97</b>                          | -                                    | <b>0.95</b>                          | -                                    |

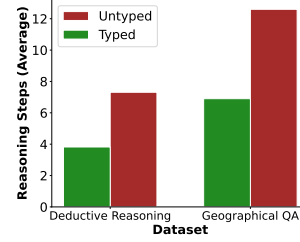

Figure 3: Influence of typing on the efficiency of the inference algorithm.

**5.2.1 RQ1: Reasoning Performance on Complete KB** Results of the reasoning performance of different methods on complete KBs are provided in Table 1. On the preference reasoning task, which has a small KB, although zero-shot and few-shot CoT with a large LLM such as Llama 3 (70B) yield superior accuracy, LLM-TH outperforms zero-shot and few-shot CoT with Mixtral and is competitive with zero-shot CoT using GPT3.5 and Gemini despite using a much smaller LLM. For the reasoning scores, LLM-TH exhibits a more correct and faithful reasoning process than all other methods. On this task, since the dataset does not contain an explicit KB, RAG-based baselines reduce to zero-shot and few-shot CoT. On larger KBs of deductive reasoning and geographical QA tasks, the limitations of existing LLM-based methods are revealed as none of them compare to the accuracy of LLM-TH. Furthermore, they all obtain imperfect reasoning scores, reflecting their hallucinations and reasoning errors. On these datasets, LLM-TH performs standard resolution which is a sound and complete inference rule, as reflected in the results. While complete KBs are impractical in real-world use cases, results of this experiment highlight that existing baselines, as opposed to LLM-TH, exhibit reasoning failures on large scale KBs *even* when they are complete.

**5.2.2 RQ2: Reasoning Performance on Incomplete KBs** To enable reasoning over practical KBs, leveraging the commonsense reasoning ability of the LLM to compensate for KB incompleteness is essential. To assess this capability, in our experiments on deductive reasoning and geographical QA datasets that have explicit KBs, we simulate KB incompleteness by omitting one of the rules used in the proof of each query, to test whether the LLM can use its commonsense knowledge to deduce, e.g., “*paying taxes*” implies “*earning revenue*”. Since few-shot and zero-shot CoT methods rely solely on the internal LLM knowledge, they are irrelevant to this RQ that examines the role of KB incompleteness. Hence, we compare LLM-TH against variations of RAG with zero-shot and few-shot CoT prompting. Results in Table 2 show that using the theory hyperresolution framework, LLM-TH is able to achieve significantly higher accuracies compared to the RAG-based baselines that clearly struggle with incompleteness compared to RAG results for complete KBs in Table 1.

**5.2.3 RQ3: Influence of Typing on Efficiency** To verify the efficiency enhancement offered by introducing type information to the hyperresolution framework of LLM-TH, we perform an ablation experiment by comparing the average number of reasoning steps that LLM-TH takes to identify answers with an untyped variant of it that does not consider variable types in prioritizing resolutions. In summary, the results of this experiment shown in Figure 3 indicate that typed hyperresolution effectively reduces the proof length by half, which translates to a significantly reduced search space.

## 6 CONCLUSION

We proposed LLM-TH for logical commonsense reasoning with large and incomplete KBs. Using theory resolution, LLM-TH integrates LLM commonsense knowledge into the resolution inference rule to enable reasoning over incomplete KBs with arbitrary predicates. LLM-TH shows strong performance: it matches or outperforms baselines that use orders of magnitude larger LLMs; its use of an LLM-based typed hyperresolution approach yields high efficiency gains; and its transparency and reparability establish it as a solution for factual and correct reasoning on large-scale KBs. In summary, LLM-TH holds promise to significantly reduce hallucinations in LLM-based reasoning.

**Ethics Statement:** By introducing LLM-TH, we tried to enhance the transparency and increasing control over the reasoning process of LLM-based logical commonsense reasoning. However, drawing logically valid conclusions does not necessarily mean that all axioms, rules, and the internal commonsense knowledge of the LLM which are leveraged in the reasoning process follow ethical requirements. A responsible and credible usage of LLM-TH, like any other reasoning framework, requires careful considerations and assessments of the knowledge base, the underlying LLM, and the user-defined axioms to ensure desired unbiased and ethical performance.

**Reproducibility Statement:** We release all our code and data in the supplementary materials, also accessible on the LLM-TH anonymous repository<sup>4</sup>. We also explain the experimental setup and dataset descriptions in Section 5, and include all prompts utilized for the LLM usage in Appendix C, as well as in the supplementary materials.

## REFERENCES

- Cem Anil, Yuhuai Wu, Anders Andreassen, Aitor Lewkowycz, Vedant Misra, Vinay Ramasesh, Ambrose Slone, Guy Gur-Ari, Ethan Dyer, and Behnam Neyshabur. Exploring length generalization in large language models. *Advances in Neural Information Processing Systems*, 35:38546–38556, 2022.
- Peter Baumgartner. An ordered theory resolution calculus. In *Logic Programming and Automated Reasoning: International Conference LPAR’92 St. Petersburg, Russia, July 15–20, 1992 Proceedings 3*, pp. 119–130. Springer, 1992.
- Ana Brassard, Benjamin Heinzerling, Pride Kavumba, and Kentaro Inui. Copa-sse: Semi-structured explanations for commonsense reasoning. In *Proceedings of the Thirteenth Language Resources and Evaluation Conference*, pp. 3994–4000, 2022.
- Chin-Liang Chang and Richard Char-Tung Lee. *Symbolic logic and mechanical theorem proving*. Academic press, 2014.
- Yupeng Chang, Xu Wang, Jindong Wang, Yuan Wu, Linyi Yang, Kaijie Zhu, Hao Chen, Xiaoyuan Yi, Cunxiang Wang, Yidong Wang, et al. A survey on evaluation of large language models. *ACM Transactions on Intelligent Systems and Technology*, 15(3):1–45, 2024.
- Antonia Creswell, Murray Shanahan, and Irina Higgins. Selection-inference: Exploiting large language models for interpretable logical reasoning. *arXiv preprint arXiv:2205.09712*, 2022.
- Nouha Dziri, Ximing Lu, Melanie Sclar, Xiang Lorraine Li, Liwei Jiang, Bill Yuchen Lin, Sean Welleck, Peter West, Chandra Bhagavatula, Ronan Le Bras, et al. Faith and fate: Limits of transformers on compositionality. *Advances in Neural Information Processing Systems*, 36, 2024.
- Jie Huang and Kevin Chen-Chuan Chang. Towards reasoning in large language models: A survey. *arXiv preprint arXiv:2212.10403*, 2022.
- Mehran Kazemi, Najoung Kim, Deepti Bhatia, Xin Xu, and Deepak Ramachandran. Lambada: Backward chaining for automated reasoning in natural language. In *Proceedings of the 61st Annual Meeting of the Association for Computational Linguistics (Volume 1: Long Papers)*, pp. 6547–6568, 2023.
- Takeshi Kojima, Shixiang Shane Gu, Machel Reid, Yutaka Matsuo, and Yusuke Iwasawa. Large language models are zero-shot reasoners. *Advances in neural information processing systems*, 35:22199–22213, 2022.
- Stefanie Krause and Frieder Stolzenburg. Commonsense reasoning and explainable artificial intelligence using large language models. In *European Conference on Artificial Intelligence*, pp. 302–319. Springer, 2023.
- Jinu Lee and Wonseok Hwang. Symba: Symbolic backward chaining for multi-step natural language reasoning. *arXiv preprint arXiv:2402.12806*, 2024.

<sup>4</sup><https://anonymous.4open.science/r/typed-logic-release-476D/>

- Mike Lewis, Yinhan Liu, Naman Goyal, Marjan Ghazvininejad, Abdelrahman Mohamed, Omer Levy, Veselin Stoyanov, and Luke Zettlemoyer. Bart: Denoising sequence-to-sequence pre-training for natural language generation, translation, and comprehension. In *Proceedings of the 58th Annual Meeting of the Association for Computational Linguistics*, pp. 7871–7880, 2020a.
- Patrick Lewis, Ethan Perez, Aleksandra Piktus, Fabio Petroni, Vladimir Karpukhin, Naman Goyal, Heinrich Küttler, Mike Lewis, Wen-tau Yih, Tim Rocktäschel, et al. Retrieval-augmented generation for knowledge-intensive nlp tasks. *Advances in Neural Information Processing Systems*, 33: 9459–9474, 2020b.
- Sewon Min, Kalpesh Krishna, Xinxu Lyu, Mike Lewis, Wen-tau Yih, Pang Koh, Mohit Iyyer, Luke Zettlemoyer, and Hannaneh Hajishirzi. Factscore: Fine-grained atomic evaluation of factual precision in long form text generation. In *Proceedings of the 2023 Conference on Empirical Methods in Natural Language Processing*, pp. 12076–12100, 2023.
- Theo Olausson, Alex Gu, Ben Lipkin, Cedegao Zhang, Armando Solar-Lezama, Joshua Tenenbaum, and Roger Levy. Linc: A neurosymbolic approach for logical reasoning by combining language models with first-order logic provers. In *Proceedings of the 2023 Conference on Empirical Methods in Natural Language Processing*, pp. 5153–5176, 2023.
- Liangming Pan, Alon Albalak, Xinyi Wang, and William Wang. Logic-lm: Empowering large language models with symbolic solvers for faithful logical reasoning. In *Findings of the Association for Computational Linguistics: EMNLP 2023*, pp. 3806–3824, 2023.
- Aske Plaat, Annie Wong, Suzan Verberne, Joost Broekens, Niki van Stein, and Thomas Back. Reasoning with large language models, a survey. *arXiv preprint arXiv:2407.11511*, 2024.
- David L Poole and Alan K Mackworth. *Artificial Intelligence: foundations of computational agents*. Cambridge University Press, 2010.
- Nazneen Fatema Rajani, Bryan McCann, Caiming Xiong, and Richard Socher. Explain yourself! leveraging language models for commonsense reasoning. *arXiv preprint arXiv:1906.02361*, 2019.
- John Alan Robinson. A machine-oriented logic based on the resolution principle. *Journal of the ACM (JACM)*, 12(1):23–41, 1965.
- Scott Sanner and Sheila A McIlraith. An ordered theory resolution calculus for hybrid reasoning in first-order extensions of description logic. In *KR*, pp. 100–111, 2006.
- Abulhair Saparov and He He. Language models are greedy reasoners: A systematic formal analysis of chain-of-thought. In *The Eleventh International Conference on Learning Representations*, 2022.
- Abulhair Saparov, Richard Yuanzhe Pang, Vishakh Padmakumar, Nitish Joshi, Mehran Kazemi, Najoung Kim, and He He. Testing the general deductive reasoning capacity of large language models using ood examples. *Advances in Neural Information Processing Systems*, 36, 2024.
- Murray Shanahan. Talking about large language models. *Communications of the ACM*, 67(2):68–79, 2024.
- Ke Shen and Mayank Kejriwal. An experimental study measuring the generalization of fine-tuned language representation models across commonsense reasoning benchmarks. *Expert Systems*, 40(5):e13243, 2023.
- Kaitao Song, Xu Tan, Tao Qin, Jianfeng Lu, and Tie-Yan Liu. Mpnet: Masked and permuted pre-training for language understanding. *Advances in neural information processing systems*, 33: 16857–16867, 2020.
- Mark E Stickel. Automated deduction by theory resolution. *Journal of Automated Reasoning*, 1(4): 333–355, 1985.
- SM Tonmoy, SM Zaman, Vinija Jain, Anku Rani, Vipula Rawte, Aman Chadha, and Amitava Das. A comprehensive survey of hallucination mitigation techniques in large language models. *arXiv preprint arXiv:2401.01313*, 2024.

- Armin Toroghi, Willis Guo, Ali Pesaraghader, and Scott Sanner. Verifiable, debuggable, and repairable commonsense logical reasoning via LLM-based theory resolution. In *The 2024 Conference on Empirical Methods in Natural Language Processing*, 2024a.
- Armin Toroghi, Willis Guo, Mohammad Mahdi Abdollah Pour, and Scott Sanner. Right for right reasons: Large language models for verifiable commonsense knowledge graph question answering. *arXiv preprint arXiv:2403.01390*, 2024b.
- Karthik Valmeekam, Matthew Marquez, Alberto Olmo, Sarath Sreedharan, and Subbarao Kambhampati. Planbench: An extensible benchmark for evaluating large language models on planning and reasoning about change. *Advances in Neural Information Processing Systems*, 36, 2024.
- Denny Vrandečić and Markus Krötzsch. Wikidata: a free collaborative knowledgebase. *Communications of the ACM*, 57(10):78–85, 2014.
- Xuezhi Wang, Jason Wei, Dale Schuurmans, Quoc V Le, Ed H Chi, Sharan Narang, Aakanksha Chowdhery, and Denny Zhou. Self-consistency improves chain of thought reasoning in language models. In *The Eleventh International Conference on Learning Representations*, 2022.
- Jason Wei, Xuezhi Wang, Dale Schuurmans, Maarten Bosma, Fei Xia, Ed Chi, Quoc V Le, Denny Zhou, et al. Chain-of-thought prompting elicits reasoning in large language models. *Advances in neural information processing systems*, 35:24824–24837, 2022.
- Adina Williams, Nikita Nangia, and Samuel Bowman. A broad-coverage challenge corpus for sentence understanding through inference. In *Proceedings of the 2018 Conference of the North American Chapter of the Association for Computational Linguistics: Human Language Technologies, Volume 1 (Long Papers)*, pp. 1112–1122, 2018.
- Shunyu Yao, Dian Yu, Jeffrey Zhao, Izhak Shafran, Tom Griffiths, Yuan Cao, and Karthik Narasimhan. Tree of thoughts: Deliberate problem solving with large language models. *Advances in Neural Information Processing Systems*, 36, 2024.
- Haochen Zhang, Anton Korikov, Parsa Farinneya, Mohammad Mahdi Abdollah Pour, Manasa Bharadwaj, Ali Pesaraghader, Xi Yu Huang, Yi Xin Lok, Zhaoqi Wang, Nathan Jones, et al. Recipe-mpr: A test collection for evaluating multi-aspect preference-based natural language retrieval. In *Proceedings of the 46th International ACM SIGIR Conference on Research and Development in Information Retrieval*, pp. 2744–2753, 2023a.
- Yanfang Zhang, Yiliu Sun, Yibing Zhan, Dapeng Tao, Dacheng Tao, and Chen Gong. Large language models as an indirect reasoner: Contrapositive and contradiction for automated reasoning. *arXiv preprint arXiv:2402.03667*, 2024.
- Yue Zhang, Yafu Li, Leyang Cui, Deng Cai, Lemao Liu, Tingchen Fu, Xinting Huang, Enbo Zhao, Yu Zhang, Yulong Chen, et al. Siren’s song in the ai ocean: a survey on hallucination in large language models. *arXiv preprint arXiv:2309.01219*, 2023b.
- Zirui Zhao, Wee Sun Lee, and David Hsu. Large language models as commonsense knowledge for large-scale task planning. *Advances in Neural Information Processing Systems*, 36, 2024.
- Denny Zhou, Nathanael Schärli, Le Hou, Jason Wei, Nathan Scales, Xuezhi Wang, Dale Schuurmans, Claire Cui, Olivier Bousquet, Quoc Le, et al. Least-to-most prompting enables complex reasoning in large language models. *arXiv preprint arXiv:2205.10625*, 2022.

## A PROOF OF LEMMA 1

**Lemma 1.** *Resolving two disjunctive clauses  $c_1$  and  $c_2$  that include complimentary literals  $l(x_1, \dots, x_n) | x_1 : T_1, \dots, x_n : T_n$  and  $\neg l(y_1, \dots, y_n) | y_1 : H_1, \dots, y_n : H_n$  under the unifier  $\theta = \{x_1/y_1, \dots, x_2/y_2\}$  creates a resolvent  $c_{res}$  with type variables  $x_1 : T_1 \sqcap H_1, \dots, x_n : T_n \sqcap H_n$ .*

*Proof.* Assume  $c_1$  to be  $A(x_1, \dots, x_n) \vee l(x_1, \dots, x_n) | x_1 : T_1, \dots, x_n : T_n$  and  $c_2$  to be  $\neg l(y_1, \dots, y_n) \vee B(y_1, \dots, y_n) | y_1 : H_1, \dots, y_n : H_n$ . Following 5 and 6, we can rewrite these clauses in implication form FOL by adding type predicates as

$$\forall x_1, \dots, \forall x_n \bigwedge_{i=1}^n T_i(x_i) \wedge \neg A(x_1, \dots, x_n) \implies l(x_1, \dots, x_n), \quad (16)$$

$$\forall y_1, \dots, \forall y_n \bigwedge_{i=1}^n H_i(y_i) \wedge l(y_1, \dots, y_n) \implies B(y_1, \dots, y_n), \quad (17)$$

Converting these clauses to the disjunctive form yields

$$\forall x_1, \dots, \forall x_n \bigvee_{i=1}^n \neg T_i(x_i) \vee A(x_1, \dots, x_n) \vee l(x_1, \dots, x_n), \quad (18)$$

$$\forall y_1, \dots, \forall y_n \bigvee_{i=1}^n \neg H_i(y_i) \vee \neg l(y_1, \dots, y_n) \vee B(y_1, \dots, y_n). \quad (19)$$

Now, we can resolve  $l(x_1, \dots, x_n)$  with  $\neg l(y_1, \dots, y_n)$  under the unifier  $\theta = \{x_1/y_1, \dots, x_n/y_n\}$  as

$$\frac{\bigvee_{i=1}^n \neg T_i(x_i) \vee A(x_1, \dots, x_n) \vee l(x_1, \dots, x_n) \quad \bigvee_{i=1}^n \neg H_i(x_i) \vee \neg l(y_1, \dots, y_n) \vee B(y_1, \dots, y_n)}{\bigvee_{i=1}^n \neg T_i(x_i) \bigvee_{i=1}^n \neg H_i(x_i) \vee A(x_1, \dots, x_n) \vee B(x_1, \dots, x_n)}, \quad (20)$$

which can be rewritten as

$$\forall x_1, \dots, \forall x_n \bigwedge_{i=1}^n T_i(x_i) \wedge H_i(x_i) \implies A(x_1, \dots, x_n) \vee B(x_1, \dots, x_n). \quad (21)$$

Therefore, the unary type predicates for each  $x_i$  becomes the conjunction of the types from their parent clauses, which in our typed FOL notation, can be equivalently written as

$$\forall x_1, \dots, \forall x_n A(x_1, \dots, x_n) \vee B(x_1, \dots, x_n) | x_1 : T_1 \sqcap H_1, \dots, x_n : T_n \sqcap H_n. \quad (22)$$

□

## B PROOF OF REPAIRABILITY OF LLM-TH

**Proposition 1.** Consider proof  $P_c^\phi$  using axiom  $\phi$  that derives clause  $c$ . For any incorrect LLM reasoning axiom  $\phi$ , a Repair Axiom  $\phi'$  can be inserted such that  $P_c^{\phi'}$  will be produced before  $P_c^\phi$ .

*Proof.* A proof  $P_c^\phi = P_c \cup \{\phi\}$  can be viewed as the combined set of clauses  $P_c$  and  $\phi$  that derive clause  $c$ . An incorrect reasoning reasoning step  $\phi$  can be either a missed inference due to the LLM mistakenly assigning a low priority to a resolution, or an incorrect resolution assigned a high priority due to an LLM misbelief.

We begin the proof for missed inference case. We can obtain the proof score  $\rho^e(P_c^\phi)$  of clause  $c$  by inductively unrolling Equation 13 for  $\rho^e(c)$  over all ancestor clauses  $P_c^\phi$  that derive it. This yields a simple product form:  $\rho^e(P_c^\phi) = \rho_\phi^{entail} \cdot \prod_{c' \in P_c} \rho_{c'}^{entail}$ . Now, comparing two different derivations  $P_c^\phi$  and  $P_c^{\phi'}$  of  $c$ , we can easily show that  $\rho^e(P_c^{\phi'}) > \rho^e(P_c^\phi)$  since  $\frac{\rho^e(P_c^{\phi'})}{\rho^e(P_c^\phi)} = \frac{\rho_{\phi'}^{entail} \cdot \prod_{c' \in P_c} \rho_{c'}^{entail}}{\rho_\phi^{entail} \cdot \prod_{c' \in P_c} \rho_{c'}^{entail}} = \frac{\rho_{\phi'}^{entail}}{\rho_\phi^{entail}} > 1$  given that the explicit Repair Axiom has  $\rho_{\phi'}^{entail} = 1$  (by definition) while the LLM entailment score  $\rho_\phi^{entail} < 1$  (necessarily). Hence, the proof  $P_c^{\phi'}$  containing the Repair Axiom  $\phi'$  will always be given precedence over  $P_c^\phi$  according to the total ordering of Equation 15 used to prioritize proofs in the LLM-TH Algorithm 1.

Correctness of the proposition for case  $\phi$  is an incorrect resolution that  $\phi'$  forbids it is obvious as  $\phi$  is simply removed from  $P_c^\phi$  and the proof will be continued from  $P_c$  with the next high priority resolution. □

## C PROMPTS USED FOR LANGUAGE MODELS

We provide the prompts that we used for the LLMs in the experiments of this paper. They are also included in our repository along with the implementation code and data.

### Prompt for Preference Reasoning Task (Zero-shot and Few-shot CoT)

Task: You will be given a query that asks for a recipe and five options that you have to choose from. Think step by step. First state your reason for your choice and then say: "Therefore, the selected recipe is <recipe id>.  
Query: {{QUERY}}  
[Examples if few-shot:]

### Prompt for Multi-domain Deductive Reasoning Task (Zero-shot and Few-shot CoT)

Task: You will be given a query about some knowledge graph entities in the form of a first order logic predicate that is either True or False (for example, "CanHoldIn(Apple, Basket)" which means one can hold an apple in a basket). Your task is to identify whether the answer to this query is "True" or "False" and also provide a proof of the answer. First, state your proof mentioning the rules you used and then say: "Therefore, the answer is True" or "Therefore, the answer is False". Think step by step.  
Query: {{QUERY}}  
[Examples if few-shot:]

### Prompt for Multi-domain Deductive Reasoning (RAG with Zero-shot and Few-shot CoT)

Task: You will be given a query about some knowledge graph entities in the form of a first order logic predicate that is either True or False (for example, "CanHoldIn(Apple, Basket)" which means one can hold an apple in a basket) and a Knowledge Base containing a set of rules that will help you identify the answer. Your task is to identify whether the answer to the query is "True" or "False" and also provide a proof of the query using the knowledge base. First state your proof mentioning the rules you used and then say: "Therefore, the answer is True" or "Therefore, the answer is False". Think step by step.  
Query: {{QUERY}}  
KB: {{KB}}  
[Examples if few-shot:]

### Prompt for Geographical QA Task (Zero-shot and Few-shot CoT)

Task: You will be given a query about geographical entities in the form of a first order logic predicate that is either True or False. Your task is to identify whether the answer to the query is "True" or "False" and also provide a proof of the query. First state your proof mentioning the rules you used and then say: "Therefore, the answer is True" or "Therefore, the answer is False". Think step by step.  
Query: {{QUERY}}  
[Examples if few-shot:]

### Prompt for Geographical QA Task (RAG with Zero-shot and Few-shot CoT)

Task: You will be given a query about geographical entities in the form of a first order logic predicate that is either True or False, and a Knowledge Base containing a set of rules that will help you identify the answer. Your task is to identify whether the answer to the query is "True" or "False" and also provide a

proof of the query using the knowledge base. First state your proof mentioning the rules you used and then say: "Therefore, the answer is True" or "Therefore, the answer is False". Think step by step.  
Query: {{QUERY}}  
KB: {{KB}}  
[Examples if few-shot:]
